# Supplementary material
Source: PubMed Central journal article supplement (PMC5637180)
Supplement: JB.00252-17_zjb999094534s1.pdf [file JB.00252-17_zjb999094534s1.pdf]

**Table S1. Primers used in this study**

| Primer name              | Primer sequence (5' to 3')                                             | Target or goal                      |
|--------------------------|------------------------------------------------------------------------|-------------------------------------|
| <i>aphB</i> 1            | AGTACGCGTCACTAGTGGGGCCCTTCTAGAGCCTGATACCACGATAAGCGGCATA                |                                     |
| <i>aphB</i> 2            | GTTTTCGTATCTAAATTTCCAGACACATTAATACCG                                   |                                     |
| <i>aphB</i> 3            | AATGTGTCTGGAAATTTAGATAGCGAAAACAAAACCAGAGCC                             | <i>aphB</i> deletion mutant         |
| <i>aphB</i> 4            | TAACAATTTGTGGAATCCCGGGAGAGCTCATTGATATGCCAAGTGCTACAGAG                  |                                     |
| <i>aphB</i> outF         | TCGCCTGAGATAGGTGCTCATAAT                                               |                                     |
| <i>aphB</i> outR         | CAGATTATTGAGATGGCTCGTGATT                                              |                                     |
| <i>aphB</i> -Flag-F      | CCATACCCGTTTTTTTGGGCTAGCGAATTCACAGGAGGAATTAACCATGAAATTAGATGACTTAAACCTG | <i>aphB</i> expressed in pBAD33-mob |
| <i>aphB</i> -Flag-R1     | TCGTCGTCCTTGATGCTGAGCCACCGCCACCGTGAATGTTATAAGCGATC                     |                                     |
| <i>aphB</i> -Flag-R2     | GGTCAGCATGGGTACCTTCTCCTCTTAACTTGTGCTGCTGCTCCTTGTAGTCTGA                |                                     |
| <i>aphB</i> -Flag2-F     | CCATACCCGTTTTTTTGGGCTAGCGAATTCACAGGAGGAATTAACCCCTGAGTGTGGAAGCGCTT      |                                     |
| pBAD33mob-C'Flag-R       | CTTGCATGCTGCAGGTCGATTACTTGTGCTGCTGCTCCTTGTAGTCTGA                      |                                     |
| <i>aphBp</i> E'28a-F     | ACTTTAAGAAGGAGATATACATGAAATTAGATGACTTAAACCTGTTTCG                      | AphB expression                     |
| <i>aphBp</i> E'28a-R     | GGTGCTCGAGTGC GGCCGCGTGTATGTATAAGCGATCACAAGTCAA                        |                                     |
| $P_{luxR}\Delta$ RBSII-F | AGTCGCACGCAAACGATCACCTAAT                                              | $P_{luxR}\Delta$ RBSII              |
| $P_{luxR}\Delta$ RBSII-R | GCAGTGATGAGTGAATGGTGCATA                                               |                                     |
| $P_{luxR}\Delta$ RBSI-F  | ACATCTGTAGAACAATTTGAACTTTATAAACTAAGACCTTCT                             | $P_{luxR}\Delta$ RBSI               |
| $P_{luxR}\Delta$ RBSI-R  | AGTTTATAAAGTCAAATTTGTTCTACAGATGTTGACCTT                                |                                     |
| $P_{luxR}\Delta$ ABS-1   | AGTCGCACGCAAACGATCACCTAATCTTTTGAAAGTCGCATCCTGTTGCC                     | $P_{luxR}\Delta$ ABS                |
| $P_{luxR}\Delta$ ABS-2   | GATCACCTAATCTTTTGAAAGTCGCATCCTGTTGCC                                   |                                     |
| $P_{luxR}\Delta$ BBS-1   | ATTTATATACAGTAAATTTAGCTATGAACCTTATAAACT                                | $P_{luxR}\Delta$ BBS                |
| $P_{luxR}\Delta$ BBS-2   | AGTTCATAGCTAAATTTACTGTATATAAATGTTCTACAG                                |                                     |
| $P_{aphB}\Delta$ BBS-F   | CTGGAAATATGAAATTAGTTACGGTTAATTTATAATTAAC                               | $P_{aphB}\Delta$ BBS                |
| $P_{aphB}\Delta$ BBS-R   | CCAGTCGAAACAGGTTAAGTCATCTGGAAATATGAAATTAG                              |                                     |
| $P_{asp}$ BBSI-1         | AATCCATTCAGCATAGCAATCGATTAATGGGTGATATTAGAATAATTA                       | $P_{asp}$ BBSI                      |
| $P_{asp}$ BBSI-2         | AAATGGGTGATATTAGAATAATTATAATTGCTTTATAAGGTTTTGTAGA                      |                                     |
| $P_{asp}$ BBSII-1        | AGAGCAAAAATGCCATTTGTACAAAAGATCATTCAATAAACAC                            | $P_{asp}$ BBSII                     |
| $P_{asp}$ BBSII-2        | GATCTTTGTACAAAATGGCATTGCTCTGTAACTATA                                   |                                     |
| $P_{asp}$ MBBSI-P1       | ACCCCTGTCCGTGGCCCGCGTGGCTGTATTAATTATTCTAAATATCA                        | $P_{asp}$ MBBSI                     |
| $P_{asp}$ MBBSI-P2       | CCGGCCACCGGACAGGGGTGGCCGGCTCCGGCCACGGACAGGGGTGGCCGGCCT                 |                                     |
| $P_{asp}$ MBBSII-P3      | TGGCATTGTTGCTCTGTACCACGGGTGGACGTCCGCGCACCTTTGTACAAAAGATCAITC           | $P_{asp}$ MBBSII                    |
| $P_{asp}$ MBBSII-P4      | TGGCATTGTTGCTCTGTAACTATAGCT                                            |                                     |
| $P_{luxR}$ MBBS-P1       | GTGACGGCGCGGTCCGCAATTTAGCTATGAACCTTAT                                  | $P_{luxR}$ MBBS                     |
| $P_{luxR}$ MBBS-P2       | GGCGACCGCCGCCGTCACTTACTGTATATAAATGTTCTA                                |                                     |
| $P_{luxR}$ MRBSI-P1      | CCGTGACGGCGCGGTCCGCGGCTAGCGGTCTTAGTTTTATAAAGTTC                        | $P_{luxR}$ MRBSI                    |
| $P_{luxR}$ MRBSI-P2      | ACCGCCCGGTCACGGCAGTGC GCGAAATTTCTACAGATGTTG                            |                                     |
| $P_{luxR}$ MRBSPI-P1     | CCTGTCATTATTATTGATAACGGGTAGCGGAATTTATAAACTAAGAC                        | $P_{luxR}$ MRBSPI                   |
| $P_{luxR}$ MRBSPI-P2     | TTATCAATAATAATGACAGGCAGTGC GCGAAATTTCTACAGATGTTG                       |                                     |
| <i>met</i> HRT-F         | ACTCAAGTGCAGAGGCATCC                                                   |                                     |
| <i>met</i> HRT-R         | CGTGAGGCTGTGGAAGATGT                                                   |                                     |
| <i>cad</i> BRT-F         | CAGCACACGCATCAGACCTA                                                   | qRT-PCR                             |
| <i>cad</i> BRT-R         | CCGTTGCGTGTGTCAIACC                                                    |                                     |
| <i>cya</i> ART-F         | TGTCATCCGTGAACGCCTAC                                                   |                                     |

|                                                  |                                                          |  |
|--------------------------------------------------|----------------------------------------------------------|--|
| <i>cya</i> ART-R                                 | ACCAGAAAACCTGGGTGCCAA                                    |  |
| <i>mur</i> BRT-F                                 | TGGCCGGAATCTTGGTTGAA                                     |  |
| <i>mur</i> BRT-R                                 | TGGTCCATGGCTGGTCAATC                                     |  |
| 01530RT-F                                        | TTCCTTCATCACGTCGCTGT                                     |  |
| 01530RT-R                                        | TACGTGAGCGTGCAGTCATT                                     |  |
| 01529RT-F                                        | GCGCGATGAAAGATCAAGCC                                     |  |
| 01529RT-R                                        | GAAGGCACAGCCTATGCTCA                                     |  |
| <i>gyrB</i> RNA-F                                | AAAGCACTTCAGTCGTGAGGAA                                   |  |
| <i>gyrB</i> RNA-R                                | TGCGCTTTACGCCAGTAAT                                      |  |
| <hr/>                                            |                                                          |  |
| <i>P<sub>luxR</sub></i> -F                       | AGTCGCACGCAAACGATCACC                                    |  |
| <i>P<sub>luxR</sub></i> -R                       | ATCCATTTTCCTTGCCATTTG                                    |  |
| <i>P<sub>aphB</sub></i> -F                       | CGCCTTGTATAAACTTAGCTCGG                                  |  |
| <i>P<sub>aphB</sub></i> -R                       | TGTAGTCCCATTTTCGACAACCAG                                 |  |
| <i>P<sub>asp</sub></i> -F                        | TGCCCTGAGGTCGACGATAATCCATTCAGCATAGCAATCG                 |  |
| <i>P<sub>asp</sub></i> -R                        | TTGCCCTATTCTTATTGAGC                                     |  |
| <i>P<sub>metH</sub></i> -F                       | TTCTCGGCTGATGCTGCTTAAATAG                                |  |
| <i>P<sub>metH</sub></i> -R                       | CATGGTCCCATACCACCAATCAATC                                |  |
| <i>P<sub>cadB</sub></i> -F                       | CAGTTTTGGTACAGCTGCATTGGTT                                |  |
| <i>P<sub>cadB</sub></i> -R                       | CCAGTACCCAACATAGTTGCTAGAG                                |  |
| <i>P<sub>cyaA</sub></i> -F                       | ATAGGTAATAAGAGCGCACTACCG                                 |  |
| <i>P<sub>cyaA</sub></i> -R                       | GCTGCTGATTCAAATATCTAGTCG                                 |  |
| <i>P<sub>murB</sub></i> -F                       | TGGCTTGCTGTAATGATCAATTCATCC                              |  |
| <i>P<sub>murB</sub></i> -R                       | CTCGCATTTGTTTAAATTTGCATAGTAGG                            |  |
| <i>P<sub>01529</sub></i> -F                      | TCAAGACAGTTGCAGAAGGCGTTGC                                |  |
| <i>P<sub>01529</sub></i> -R                      | TATGCTTTGGGGTCGAAGTCATCAC                                |  |
| <i>P<sub>01530</sub></i> -F                      | AAGTACTGCCTCTATTTGCGTCGAT                                |  |
| <i>P<sub>01530</sub></i> -R                      | ATTGTAATAGTTATTGCCGTC                                    |  |
| <i>P<sub>gyrB</sub></i> -F                       | GACACAGTGTGGCGATATAGCA                                   |  |
| <i>P<sub>gyrB</sub></i> -R                       | TAAGTGATTTGTGCGCATTTGGT                                  |  |
| <hr/>                                            |                                                          |  |
| pDM8- <i>P<sub>aphB</sub></i> - <i>luxAB</i> -P1 | ATTGCTGCAGGTCGACGGATCCGGGAATTTCACATAAGATAAGATCGGGTTGGC   |  |
| pDM8- <i>P<sub>aphB</sub></i> - <i>luxAB</i> -P2 | ACATTTCTTATTGATTTCAGACACATTAATTACCGA                     |  |
| pDM8- <i>P<sub>aphB</sub></i> - <i>luxAB</i> -P3 | AATGTGTCTGGAAATCAAATAAGGAAATGTTATG                       |  |
| pDM8- <i>P<sub>luxR</sub></i> - <i>luxAB</i> -P1 | ATTGCTGCAGGTCGACGGATCCGGGAATTAGTCAGTTCGATAGCACGTGCCAAG   |  |
| pDM8- <i>P<sub>luxR</sub></i> - <i>luxAB</i> -P2 | ACATTTCTTATTGATCCATTTCTTGCCATTGAGTT                      |  |
| pDM8- <i>P<sub>luxR</sub></i> - <i>luxAB</i> -P3 | CAAATGGCAAGGAAAATGGATCAAATAAGGAAATGTTATG                 |  |
| pDM8- <i>P<sub>asp</sub></i> - <i>luxAB</i> -P1  | ATTGCTGCAGGTCGACGGATCCGGGAATTATCGATAGTGAAGTCACTACCATCT   |  |
| pDM8- <i>P<sub>asp</sub></i> - <i>luxAB</i> -P2  | ACATTTCTTATTGTTGCCCTATTCTTATTGAGC                        |  |
| pDM8- <i>P<sub>asp</sub></i> - <i>luxAB</i> -P3  | TAAGGAATAGGGCAACAAATAAGGAAATGTTATG                       |  |
| <i>luxAB</i> -pDM8-P4                            | GTCGACCTGCAGCCCAAGCTTATCGATTCTGTTACGAGTGGTATTTGACGATGTTG |  |
| <hr/>                                            |                                                          |  |
| MP <sub><i>asp</i></sub> -up-1                   | AGTACGCGTCACTAGTGGGCCCTTCTAGAATCGATAGTGAAGTCACTACCAATC   |  |
| MP <sub><i>asp</i></sub> -up-2                   | CATTTAATCGATTGCTATGCTGAATGGATTTTTGACCGTGGTGCCAAAACGAA    |  |
| MP <sub><i>asp</i></sub> -dn-1                   | TTAGCTCAAATAAGGAATAGGGCAAATGCCTACACAACAAGTAAAAAAC        |  |
| MP <sub><i>asp</i></sub> -dn-2                   | TAACAATTTGTGGAATCCCGGGAGAGCTCCGCGATTGCCAGTTTTTCCACCTT    |  |

EMSA  
or DNase I  
footprinting

Fluorescence  
assay

HPA assay
